# Supplementary material
Source: PubMed Central journal article supplement (PMC6599281)
Supplement: gly134_suppl_supplementary_materials.pdf [file gly134_suppl_supplementary_materials.pdf]

**Appendix A. Cohort Assembly**

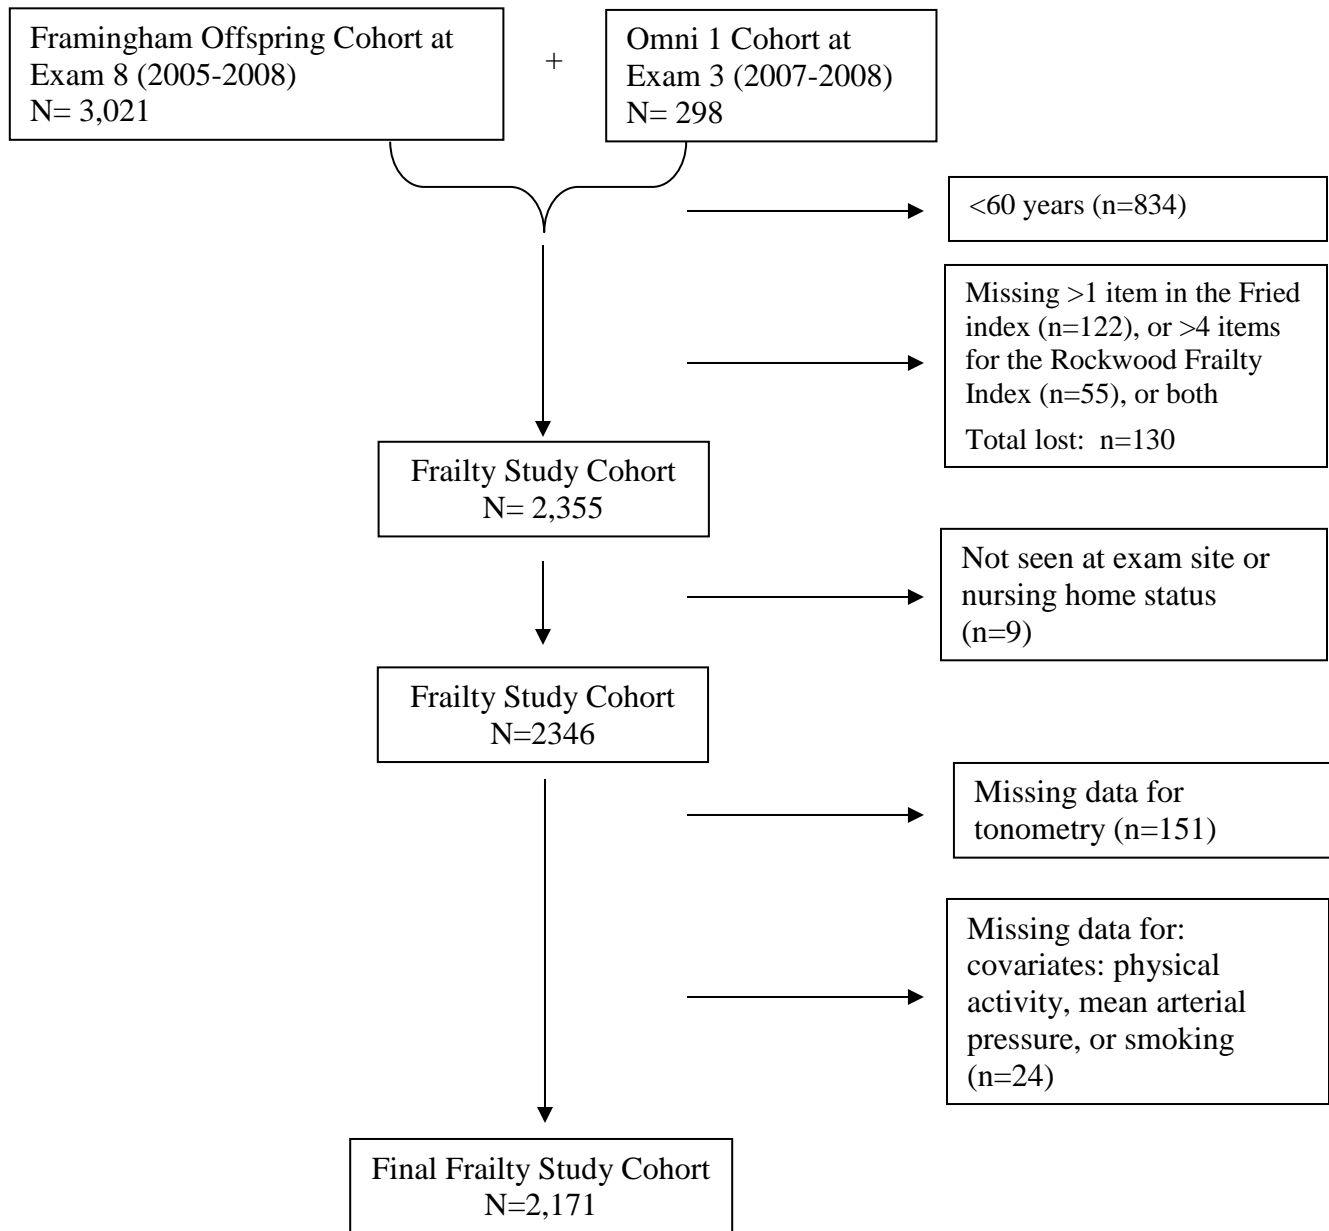

## Appendix B. Defining Frailty in the Framingham Heart Study

### 1. Variables used to derive the Fried frailty phenotype as previously defined in the Framingham Offspring Study:<sup>1</sup>

| Characteristics of frailty:   |                                                                                                                              |                                                                                            |
|-------------------------------|------------------------------------------------------------------------------------------------------------------------------|--------------------------------------------------------------------------------------------|
| Characteristic                | Men                                                                                                                          | Women                                                                                      |
| Weight loss                   | Unintentional weight loss >10 pounds in last year                                                                            |                                                                                            |
| Exhaustion                    | Answer of 'Most or all of the time' to question of 'Could not get going' and/or 'I felt that everything I did was an effort' |                                                                                            |
| Low physical activity         | Lowest 20% of Framingham physical activity index for men                                                                     | Lowest 20% of Framingham physical activity index for women                                 |
| Slow: gait speed (m/s)        | Height ≤ 173 cm: ≤0.96<br>Height >173 cm: ≤1.04                                                                              | Height ≤ 159 cm: ≤0.90<br>Height >159 cm: ≤1.02                                            |
| Weak: hand grip strength (kg) | BMI ≤ 24.0: ≤ 29<br>BMI 24.1-26.0: ≤ 30<br>BMI 26.1-28.0: ≤ 30<br>BMI > 28.0: ≤ 32                                           | BMI ≤ 23.0: ≤ 17<br>BMI 23.1 to 26.0: ≤ 17.3<br>BMI 26.1 to 29.0: ≤ 18<br>BMI > 29.0: ≤ 21 |

Calculating frailty: Participants with ≥3 criteria are considered frail, those with 1-2 criteria are pre-frail while those with none are robust.

### 2. Variables used to derive the Rockwood frailty index (FI)

| Count | Variable                                                                                                                                                                                                                  | Coding for the Frailty Index                                            |
|-------|---------------------------------------------------------------------------------------------------------------------------------------------------------------------------------------------------------------------------|-------------------------------------------------------------------------|
|       | <b>Function</b>                                                                                                                                                                                                           |                                                                         |
| 1     | Are you able to do heavy work around the house, like shoveling snow or washing windows, walls, or floors without help?                                                                                                    | Yes = 0, No =1                                                          |
| 2     | Are you able to walk half a mile without help? (About 4-6 blocks)                                                                                                                                                         | Yes = 0, No =1                                                          |
| 3     | Are you able to walk up and down one flight of stairs without help?                                                                                                                                                       | Yes = 0, No =1                                                          |
| 4     | 1. During the past week, I felt that everything I did was an effort                                                                                                                                                       | Rarely=0,<br>Some or Occasionally = 0.5,<br>Most of the time =1         |
| 5     | 2. During the past week, I could not "get going"                                                                                                                                                                          |                                                                         |
| 6     | <i>Katz ADL:</i> During the Course of a Normal Day, Can you do the following activities independently or do you need human assistance or use of a device?<br>1. Dressing<br>2. Bathing<br>3. Transferring<br>4. Toileting | 0 = 0 (independent)<br>1, 2 = 0.5 (any assistance)<br>3 = 1 (dependent) |
| 7     |                                                                                                                                                                                                                           |                                                                         |
| 8     |                                                                                                                                                                                                                           |                                                                         |
| 9     |                                                                                                                                                                                                                           |                                                                         |
|       | <b>Health Status and Function</b>                                                                                                                                                                                         |                                                                         |
|       | Does your health now limit you in these activities? If so, how much?                                                                                                                                                      |                                                                         |
| 10    | Moderate activities, such as moving a table, pushing a vacuum cleaner, bowling, or playing golf                                                                                                                           | A lot =1, a little = 0.5, No = 0                                        |
| 11    | Climbing several flights of stairs?                                                                                                                                                                                       | A lot =1, a little = 0.5, No = 0                                        |

|    |                                                                                                                                                                                                   |                                                                                                                                                                |
|----|---------------------------------------------------------------------------------------------------------------------------------------------------------------------------------------------------|----------------------------------------------------------------------------------------------------------------------------------------------------------------|
|    | During the past 4 weeks have you had any of the following problems with your work or other regular daily activities as a result of your physical health?                                          |                                                                                                                                                                |
| 12 | Accomplished less than you would like                                                                                                                                                             | Yes =1, No = 0                                                                                                                                                 |
| 13 | Were limited in the kind of work or other activities                                                                                                                                              | Yes = 1, No = 0                                                                                                                                                |
| 14 | Self-rating of health: “In general, would you say your health is: excellent, very good, good, fair, poor”                                                                                         | Poor =1, Fair =0.75, Good = 0.5, Very Good = 0.25, Excellent = 0                                                                                               |
|    | <b>Mood</b>                                                                                                                                                                                       |                                                                                                                                                                |
|    | During the past 4 weeks have you had any of the following problems with your work or other regular daily activities as a result of any emotional problems (such as feeling depressed or anxious)? |                                                                                                                                                                |
| 15 | Accomplished less than you would like                                                                                                                                                             | Yes = 1, No = 0                                                                                                                                                |
| 16 | Didn't do work or other activities as carefully as usual                                                                                                                                          | Yes = 1, No = 0                                                                                                                                                |
| 17 | During the past 4 weeks, how much did pain interfere with your normal work (including both work outside the home and housework)                                                                   | Not at all = 0, a little = 0.25, Moderately = 0.5, Quite a bit = 0.75, Extremely = 1                                                                           |
|    | How much of the time during the past 4 weeks...                                                                                                                                                   |                                                                                                                                                                |
| 18 | Have you felt calm and peaceful?                                                                                                                                                                  | All or most of the time = 0, A good bit of the time =0.25, some of the time = 0.5, a little of the time = 0.75, none of the time = 1                           |
| 19 | Did you have a lot of energy?                                                                                                                                                                     | All or most of the time = 0, A good bit of the time =0.25, some of the time = 0.5, a little of the time = 0.75, none of the time = 1                           |
| 20 | Have you felt downhearted and blue?                                                                                                                                                               | All or most of the time = 1, A good bit of the time =0.75, some of the time = 0.5, a little of the time = 0.25, none of the time = 0                           |
| 21 | During the past 4 weeks, how much of the time has your physical health or emotional problems interfered with social activities (like visiting friends, relatives, etc.)?                          | All of the time = 1, Most of the time =0.75, some of the time = 0.5, a little of the time = 0.25, none of the time = 0                                         |
|    | <b>Comorbidities</b>                                                                                                                                                                              |                                                                                                                                                                |
| 22 | Hypertension – measured or medication use                                                                                                                                                         | >140/90 or history or med use=1, <140/90 or no history or med use=0                                                                                            |
| 23 | Lung comorbidity: asthma, chronic bronchitis, emphysema, COPD, or pulmonary fibrosis                                                                                                              | If answered Yes to any = 1, If answered Maybe to any = 0.5, If all No then =0                                                                                  |
| 24 | Diabetes – fasting blood glucose >125 mg/dl or use of oral hypoglycemic medications or insulin                                                                                                    | Elevated blood glucose or med use=1, Normal blood glucose or no med use=0                                                                                      |
| 25 | Coronary artery disease                                                                                                                                                                           | Using validated events:<br>Myocardial infarction or coronary insufficiency = Yes = 1<br>Angina or possible coronary insufficiency = Maybe= 0.5<br>No events =0 |
| 26 | Chronic Kidney Disease                                                                                                                                                                            | eGFR ≥60 (stage I and II) = 0<br>eGFR ≥30-60 (stage III) = 0.5<br>eGFR <30 (stage IV and V) = 1                                                                |
| 27 | Any osteoporosis related fracture between exam 7-8                                                                                                                                                | Yes = 1, No =0                                                                                                                                                 |
| 28 | CHF                                                                                                                                                                                               | Yes = 1, Maybe = 0.5, No =0                                                                                                                                    |
| 29 | Stroke or TIA                                                                                                                                                                                     | Yes = 1, Maybe = 0.5, No =0                                                                                                                                    |
| 30 | Cancer (excluding non-melanoma skin cancer)                                                                                                                                                       | Yes = 1, Maybe = 0.5, No =0                                                                                                                                    |

|    |                                                                                                                                                                                                                                                            |                                                                                                                                                                                                                                                                                                                       |
|----|------------------------------------------------------------------------------------------------------------------------------------------------------------------------------------------------------------------------------------------------------------|-----------------------------------------------------------------------------------------------------------------------------------------------------------------------------------------------------------------------------------------------------------------------------------------------------------------------|
| 31 | Arthritis comorbidity: rheumatoid disease, degenerative joint disease, gout, or musculoskeletal/connective tissue disorder                                                                                                                                 | If any are Yes = 1<br>If any are Maybe without Yes = 0.5<br>If all No then =0                                                                                                                                                                                                                                         |
|    | <b>Cognition</b>                                                                                                                                                                                                                                           |                                                                                                                                                                                                                                                                                                                       |
| 32 | Dementia by self-report, validated events or Mini-Mental Status Exam (MMSE)<br>- Self report: Have you been told by a doctor you have memory problems, dementia or Alzheimer's disease?                                                                    | if ever diagnosed with dementia or if they report ever being told they have dementia, or MMSE <18 (consistent with significant cognitive impairment) =1,<br>self-report maybe or MMSE 18-23 (consistent with mild cognitive impairment diagnosis)=0.5,<br>else if both event and self-report are no and MMSE >=24 =0. |
|    | <b>Directly measured variables and performance measures</b>                                                                                                                                                                                                |                                                                                                                                                                                                                                                                                                                       |
| 33 | BMI                                                                                                                                                                                                                                                        | <18.5 or >30=1,<br>25-<30 = 0.5<br>18.5-<25 = 0                                                                                                                                                                                                                                                                       |
| 34 | Weight loss                                                                                                                                                                                                                                                | >10 lbs in the last year =1, otherwise =0                                                                                                                                                                                                                                                                             |
| 35 | Grip strength (in kg)<br>- Participants were asked to squeeze a Jamar dynamometer (Lafayette Instrument Co, Lafayette, IN) as hard as possible with each hand, three times. The force generated was recorded in kilograms, and the highest value was used. | Men:<br>For BMI ≤24, GS≤29 =1<br>For BMI 24.1-28, GS≤30 =1<br>For BMI >28, GS ≤32 =1<br>Women:<br>For BMI ≤23, GS≤17 =1<br>For BMI 23.1-26, GS≤17.3 =1<br>For BMI 26.1-29, GS ≤18 =1<br>For BMI >29, GS≤21 =1<br>If unable to complete due to physical limitation =1                                                  |
| 36 | Gait speed<br>- 4-meter measured walk                                                                                                                                                                                                                      | <0.8m/s =1<br>Unable to complete walk due to physical limitation=1                                                                                                                                                                                                                                                    |
|    | <b>Other</b>                                                                                                                                                                                                                                               |                                                                                                                                                                                                                                                                                                                       |
| 37 | Have you been admitted to a nursing home (or skilled facility) in the past year?                                                                                                                                                                           | Yes = 1, No =0                                                                                                                                                                                                                                                                                                        |

### 3. Distribution of Frailty according to the Fried Phenotype

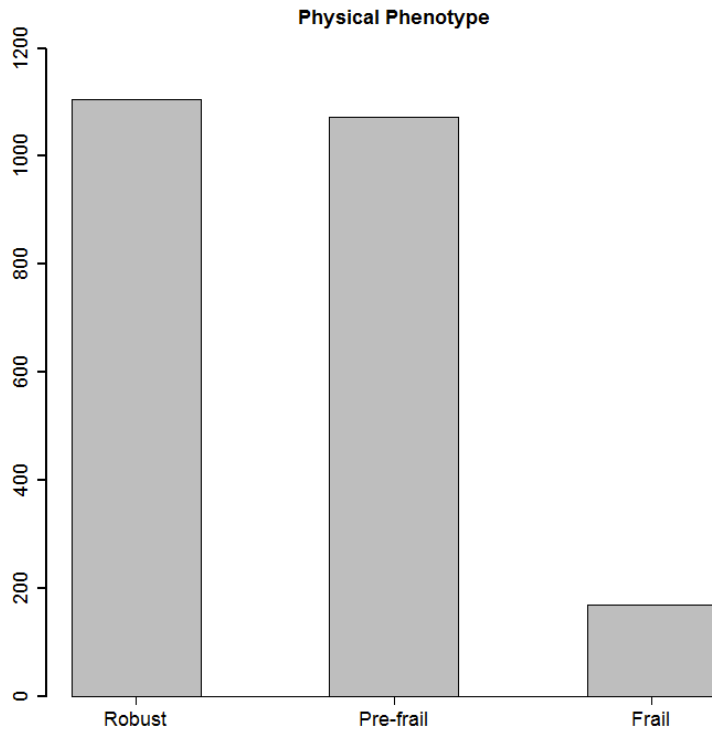

### 4. Distribution of Frailty according to the Rockwood Frailty Index

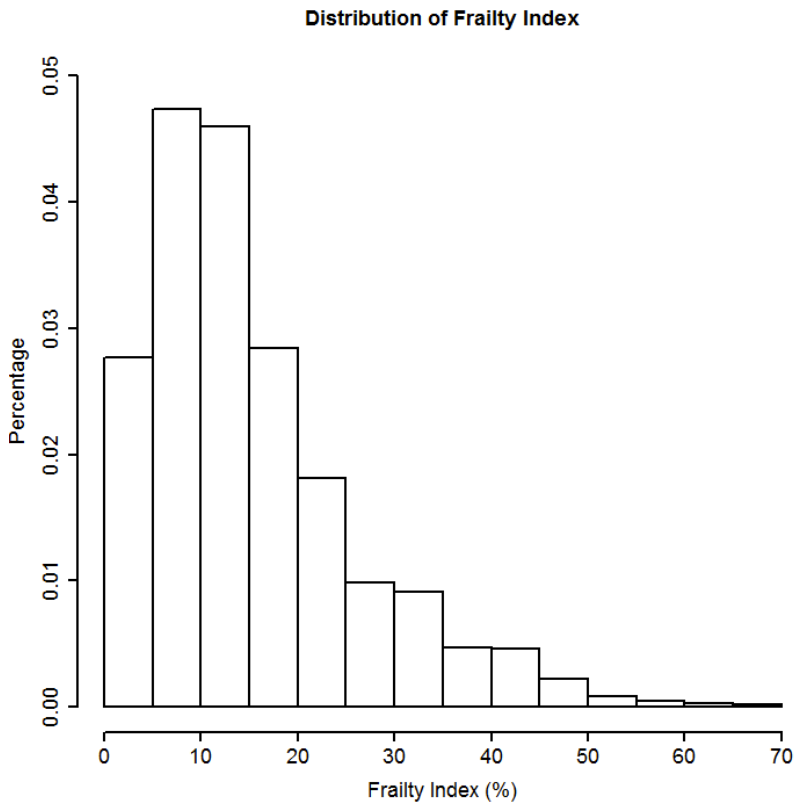

Reference:

1. Liu CK, Lyass A, Larson MG, et al. Biomarkers of oxidative stress are associated with frailty: the Framingham Offspring Study. *Age (Dordr)* 2016;38:1.

**Appendix C: Characteristics of the Omni cohort (n=149), by frailty status**

|                                                    | Fried Physical Phenotype |              |              | Rockwood Frailty Index |              |             |
|----------------------------------------------------|--------------------------|--------------|--------------|------------------------|--------------|-------------|
|                                                    | non-frail                | pre-frail    | frail        | non-frail              | pre-frail    | frail       |
| N                                                  | 50                       | 89           | 10           | 59                     | 56           | 34          |
| Age, mean (SD)                                     | 67.6 (5.8)               | 68.1 (5.9)   | 74.1 (9.9)   | 66.3 (5.3)             | 68.2 (5.3)   | 71.9 (7.9)  |
| Women (%)                                          | 50                       | 67           | 80           | 54                     | 62           | 76          |
| Body Mass Index, mean(SD)                          | 27.4 (5.8)               | 29.4 (6.2)   | 28.8 (6.0)   | 26.0 (4.7)             | 29.5 (6.4)   | 32 (6.0)    |
| Systolic BP, mmHg, mean(SD)‡                       | 133 (23)                 | 129 (16)     | 142 (17)     | 133 (22)               | 128 (15)     | 134 (18)    |
| Diastolic BP, mmHg, mean(SD) ‡                     | 74 (9)                   | 72 (8)       | 75 (8)       | 75 (7.5)               | 72 (9)       | 72 (8)      |
| Mean Arterial Pressure, mm Hg, mean (SD)*          | 97 (13)                  | 99 (10)      | 103 (12)     | 99 (12)                | 96 (10)      | 102 (11)    |
| Heart Rate mean(SD)                                | 58 (9)                   | 61 (11)      | 61 (10)      | 58 (9)                 | 59 (10)      | 64 (13)     |
| Height (inches) mean(SD)                           | 65.0 (3.9)               | 64.3 (3.5)   | 61.8 (2.9)   | 64.8 (3.7)             | 64.4 (3.7)   | 63.4 (3.5)  |
| Smoking status(%)                                  |                          |              |              |                        |              |             |
| Current                                            | 0                        | 4.5          | 10.0         | 3.4                    | 0            | 8.8         |
| Former                                             | 0                        | 4.5          | 10.0         | 0                      | 1.8          | 11.8        |
| Never                                              | 100                      | 91.0         | 80.0         | 96.6                   | 98.2         | 79.4        |
| Prevalent Coronary heart disease(%)                | 6                        | 9            | 10           | 5                      | 5            | 18          |
| Prevalent Diabetes(%)                              | 24                       | 34           | 20           | 8                      | 38           | 53          |
| Prevalent Hyperlipidemia(%)                        | 80                       | 73           | 70           | 78                     | 73           | 74          |
| Prevalent Hypertension(%)                          | 57                       | 68           | 100          | 52                     | 75           | 79          |
| Physical Activity Index score, mean(SD)            | 36.3 (5.2)               | 33.8 (3.9)   | 28.9 (2.2)   | 35.8 (5.1)             | 34.3 (4.0)   | 31.7 (3.8)  |
| Gait speed, m/s, mean(SD)                          | 1.24 (0.19)              | 1.02 (0.23)  | 0.79 (0.25)  | 1.16 (0.22)            | 1.1 (0.23)   | 0.89 (0.26) |
| Hand grip strength(kg)                             | 34.7 (10.5)              | 27.6 (9.1)   | 18.8 (6.3)   | 32.9 (9.8)             | 28.5 (11.1)  | 24.7 (7.9)  |
| Frailty Index score, mean (SD)                     | 9.11 (5.85)              | 16.6 (10.56) | 39.46 (12.2) | 6.23 (2.44)            | 14.49 (3.25) | 33.78 (10)  |
| Physical Frailty score, mean (SD)                  | 0 (0)                    | 1.3 (0.4)    | 3.5 (0.7)    | 0.5 (0.7)              | 0.9 (0.7)    | 1.9 (1.2)   |
| Carotid-Femoral Pulse Wave Velocity, m/s, mean(SD) | 9.5 (2.3)                | 10.2 (3.3)   | 12.0 (4.6)   | 9.7 (2.8)              | 9.9 (3.2)    | 11.0 (3.6)  |

Appendix D.  
Kaplan Meier Curves for Mortality Using Each Frailty Definition

1. Rockwood Frailty Index

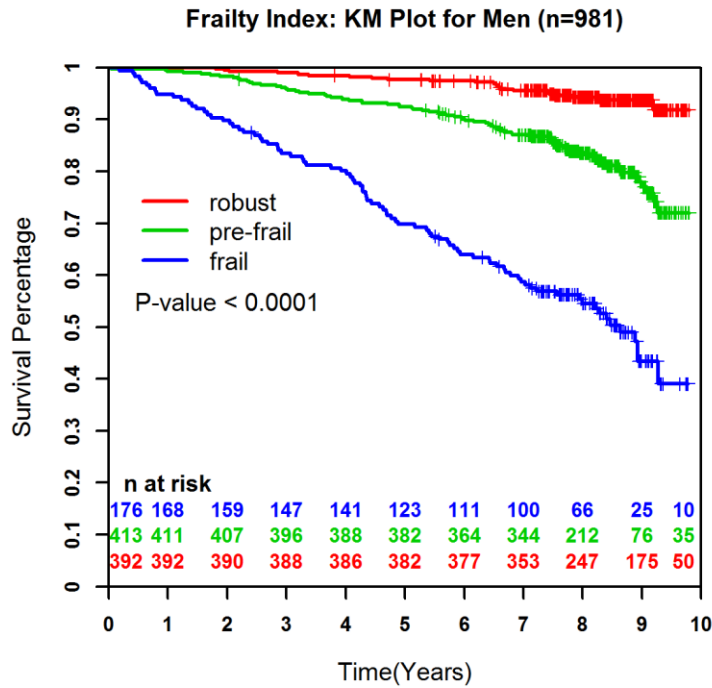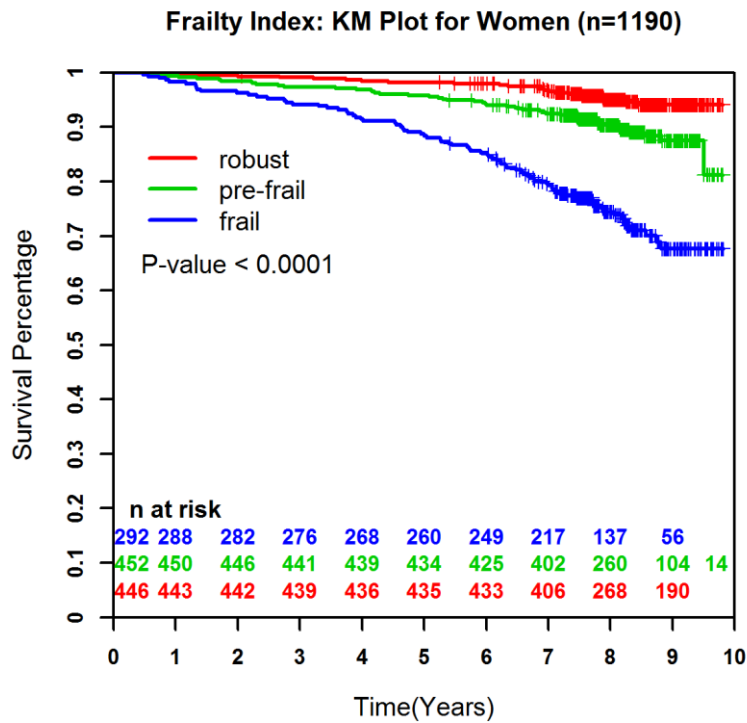



## 2. Fried Physical Phenotype

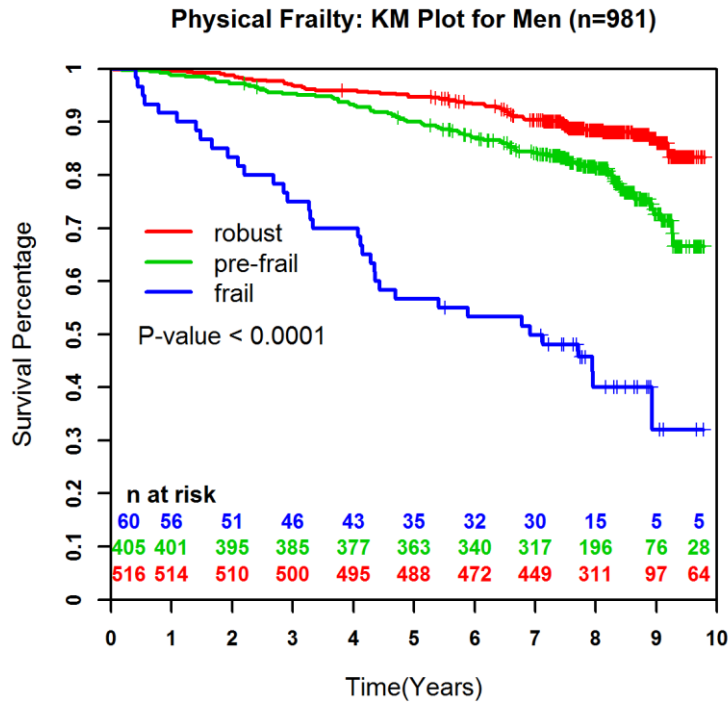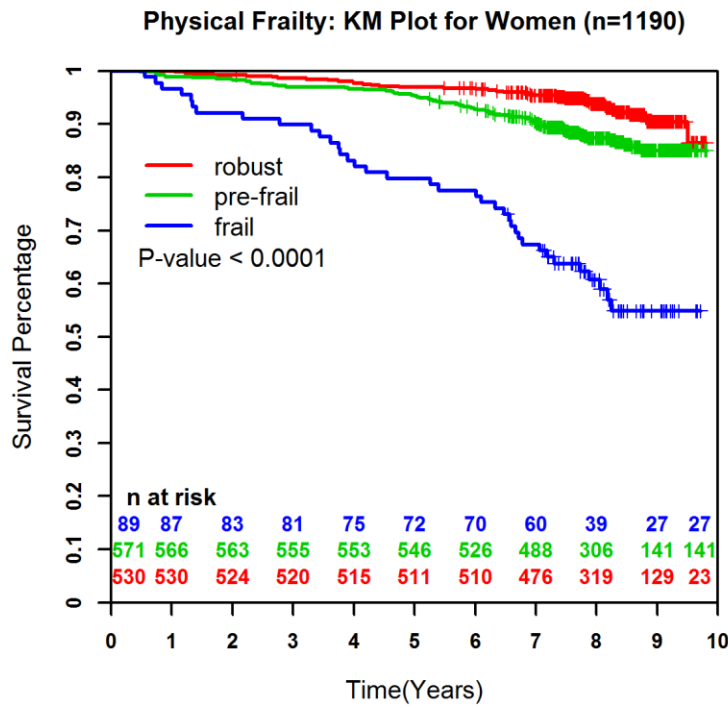

**Appendix E:** Nested models demonstrating how the estimates and p-values change as covariates are added.

Results are shown using the negative inverse CFPWV as the outcome.

| Model                             | Fried Phenotype  |              |                |                | Rockwood FI  |                |                   |
|-----------------------------------|------------------|--------------|----------------|----------------|--------------|----------------|-------------------|
|                                   | Variable         | b            | Standard Error | p-value        | b            | Standard Error | p-value           |
| Unadjusted                        | Intercept        | -102.95      | 0.86           | < 2e-16        | -104.76      | 0.92           | < 2e-16           |
|                                   | <b>Pre-frail</b> | <b>7.82</b>  | <b>1.17</b>    | <b>2.1e-11</b> | <b>7.36</b>  | <b>1.28</b>    | <b>&lt; 2e-16</b> |
|                                   | <b>Frail</b>     | <b>17.08</b> | <b>2.52</b>    | <b>1.2e-11</b> | <b>16.55</b> | <b>1.43</b>    | <b>8.6e-9</b>     |
| Age only                          | Intercept        | -229.48      | 5.44           | <2e-16         | -226.52      | 5.56           | < 2e-16           |
|                                   | Age              | 1.86         | 0.08           | <2e-16         | 1.81         | 0.08           | <2e-16            |
|                                   | <b>Pre-frail</b> | <b>3.17</b>  | <b>1.04</b>    | <b>0.002</b>   | <b>2.30</b>  | <b>1.15</b>    | <b>0.045</b>      |
|                                   | <b>Frail</b>     | <b>3.16</b>  | <b>2.31</b>    | <b>0.17</b>    | <b>6.05</b>  | <b>1.42</b>    | <b>1.93E-05</b>   |
| Age and sex                       | Intercept        | -231.83      | 5.47           | < 2e-16        | -228.74      | 5.6            | <2e-16            |
|                                   | Age              | 1.85         | 0.08           | < 2e-16        | 1.80         | 0.08           | <2e-16            |
|                                   | Male             | 6.21         | 0.94           | 3.5e-11        | 6.26         | 0.93           | 1.77E-11          |
|                                   | <b>Pre-frail</b> | <b>3.69</b>  | <b>1.04</b>    | <b>0.0004</b>  | <b>2.27</b>  | <b>1.13</b>    | <b>0.045</b>      |
|                                   | <b>Frail</b>     | <b>3.80</b>  | <b>2.28</b>    | <b>0.096</b>   | <b>6.69</b>  | <b>1.42</b>    | <b>2.64E-06</b>   |
| Age, sex, cohort                  | Intercept        | -236.93      | 5.67           | < 2e-16        | -233.51      | 5.79           | <2e-16            |
|                                   | Age              | 1.83         | 0.08           | < 2e-16        | 1.78         | 0.08           | <2e-16            |
|                                   | Male             | 6.09         | 0.93           | 6.7e-11        | 6.13         | 0.93           | 3.62E-11          |
|                                   | Cohort           | 6.72         | 2.06           | 0.0011         | 6.19         | 2.07           | 0.003             |
|                                   | <b>Pre-frail</b> | <b>4.01</b>  | <b>1.04</b>    | <b>0.0001</b>  | <b>2.27</b>  | <b>1.13</b>    | <b>0.045</b>      |
|                                   | <b>Frail</b>     | <b>4.06</b>  | <b>2.28</b>    | <b>0.076</b>   | <b>6.77</b>  | <b>1.42</b>    | <b>1.9E-06</b>    |
| Age, sex, cohort, MAP, HR         | Intercept        | -329.89      | 6.4            | < 2e-16        | -327.35      | 6.51           | < 2e-16           |
|                                   | Age              | 1.68         | 0.07           | < 2e-16        | 1.65         | 0.07           | < 2e-16           |
|                                   | Male             | 8.83         | 0.91           | < 2e-16        | 8.82         | 0.90           | < 2e-16           |
|                                   | Cohort           | 5.53         | 1.78           | 0.0019         | 5.13         | 1.79           | 0.004             |
|                                   | MAP              | 0.74         | 0.04           | < 2e-16        | 0.74         | 0.04           | < 2e-16           |
|                                   | HR               | 0.50         | 0.05           | < 2e-16        | 0.49         | 0.05           | < 2e-16           |
|                                   | <b>Pre-frail</b> | <b>3.15</b>  | <b>0.88</b>    | <b>0.0004</b>  | <b>1.90</b>  | <b>0.95</b>    | <b>0.046</b>      |
|                                   | <b>Frail</b>     | <b>4.90</b>  | <b>2.08</b>    | <b>0.019</b>   | <b>5.64</b>  | <b>1.28</b>    | <b>1.14E-05</b>   |
| Age, sex, cohort, MAP, HR smoking | Intercept        | -329.82      | 6.32           | < 2e-16        | -327.3       | 6.43           | < 2e-16           |
|                                   | Age              | 1.67         | 0.07           | < 2e-16        | 1.65         | 0.07           | < 2e-16           |
|                                   | Male             | 8.42         | 0.94           | < 2e-16        | 8.42         | 0.93           | < 2e-16           |
|                                   | Cohort           | 4.08         | 1.85           | 0.028          | 3.77         | 1.87           | 0.044             |
|                                   | MAP              | 0.74         | 0.04           | < 2e-16        | 0.74         | 0.04           | < 2e-16           |
|                                   | HR               | 0.51         | 0.05           | < 2e-16        | 0.50         | 0.05           | < 2e-16           |
|                                   | Current Smoking  | 0.81         | 1.68           | 0.63           | 0.56         | 1.65           | 0.735             |
|                                   | Former Smoking   | 2.77         | 0.98           | 0.005          | 2.59         | 0.98           | 0.008             |
|                                   | <b>Pre-frail</b> | <b>3.21</b>  | <b>0.88</b>    | <b>0.0003</b>  | <b>1.91</b>  | <b>0.96</b>    | <b>0.05</b>       |
|                                   | <b>Frail</b>     | <b>4.85</b>  | <b>2.08</b>    | <b>0.020</b>   | <b>5.57</b>  | <b>1.28</b>    | <b>1.30E-05</b>   |

|                                                                    |                  |             |             |               |             |             |                 |
|--------------------------------------------------------------------|------------------|-------------|-------------|---------------|-------------|-------------|-----------------|
| <b>Age, sex, cohort, heart rate, MAP, smoking, height,</b>         | Intercept        | -351.39     | 14.10       | < 2e-16       | -346.59     | 14.38       | < 2e-16         |
|                                                                    | Age              | 1.70        | 0.07        | < 2e-16       | 1.67        | 0.07        | < 2e-16         |
|                                                                    | Male             | 6.65        | 1.46        | 5.41E-06      | 6.84        | 1.46        | 2.93E-06        |
|                                                                    | Cohort           | 3.84        | 1.87        | 0.04          | 3.54        | 1.88        | 0.06            |
|                                                                    | MAP              | 0.74        | 0.04        | < 2e-16       | 0.74        | 0.04        | < 2e-16         |
|                                                                    | HR               | 0.50        | 0.05        | < 2e-16       | 0.50        | 0.05        | < 2e-16         |
|                                                                    | Current Smoking  | 0.84        | 1.69        | 0.62          | 0.60        | 1.66        | 0.72            |
|                                                                    | Former Smoking   | 2.76        | 0.98        | 0.005         | 2.58        | 0.98        | 0.0083          |
|                                                                    | Height           | 0.32        | 0.19        | 0.09          | 0.28        | 0.19        | 0.14            |
|                                                                    | <b>Pre-frail</b> | <b>3.30</b> | <b>0.88</b> | <b>0.0002</b> | <b>1.94</b> | <b>0.96</b> | <b>0.04</b>     |
|                                                                    | <b>Frail</b>     | <b>5.04</b> | <b>2.09</b> | <b>0.02</b>   | <b>5.60</b> | <b>1.27</b> | <b>1.07E-05</b> |
| <b>Age, sex, cohort, heart rate, MAP, smoking, height, and PAI</b> | Intercept        | -345.68     | 14.53       | < 2e-16       | -340.32     | 14.62       | < 2e-16         |
|                                                                    | Age              | 1.70        | 0.07        | < 2e-16       | 1.67        | 0.07        | < 2e-16         |
|                                                                    | Male             | 6.73        | 1.46        | 4.12E-06      | 6.92        | 1.46        | 2.17E-06        |
|                                                                    | Cohort           | 3.92        | 1.86        | 0.04          | 3.69        | 1.88        | 0.05            |
|                                                                    | MAP              | 0.74        | 0.04        | < 2e-16       | 0.74        | 0.04        | < 2e-16         |
|                                                                    | HR               | 0.50        | 0.05        | < 2e-16       | 0.49        | 0.05        | < 2e-16         |
|                                                                    | Current Smoking  | 0.81        | 1.69        | 0.63          | 0.53        | 1.67        | 0.75            |
|                                                                    | Former Smoking   | 2.758       | 0.983       | 0.005         | 2.58        | 0.98        | 0.008           |
|                                                                    | Height           | 0.31        | 0.19        | 0.10          | 0.28        | 0.19        | 0.14            |
|                                                                    | PAI              | -0.13       | 0.09        | 0.16          | -0.15       | 0.09        | 0.09            |
|                                                                    | <b>Pre-frail</b> | <b>2.95</b> | <b>0.89</b> | <b>0.0009</b> | <b>1.81</b> | <b>0.96</b> | <b>0.06</b>     |
|                                                                    | <b>Frail</b>     | <b>4.16</b> | <b>2.22</b> | <b>0.06</b>   | <b>5.13</b> | <b>1.28</b> | <b>6.16E-05</b> |
